# Supplementary material for: Weight Loss and Short-Chain Fatty Acids Reduce Systemic Inflammation in Monocytes and Adipose Tissue Macrophages from Obese Subjects
Source: MDPI journal article supplement (doi:10.3390/nu14040765), 2022-02-11
Supplement: s1 [file s1]

Table S1. Multiple linear regression model. Multiple linear regression model. mRNA gene expression of monocytes following propionate treatment.

| Dependent Variable.                        | Independent Variable | Model       |          |                |                         |          |
|--------------------------------------------|----------------------|-------------|----------|----------------|-------------------------|----------|
|                                            |                      | Coefficient | <i>p</i> | R <sup>2</sup> | Adjusted R <sup>2</sup> | <i>p</i> |
| <b>TNF-<math>\alpha</math></b><br>F (2,20) | FFAR3                | 0.256       | 0.094    | 0.41           | 0.35                    | 0.005    |
|                                            | HDAC2                | 0.863       | 0.015    |                |                         |          |
| <b>IL-6</b><br>F (2,20)                    | FFAR2                | 0.37        | 0.022    | 0.37           | 0.30                    | 0.013    |
|                                            | FFAR3                | 0.31        | 0.027    |                |                         |          |
| <b>NFKB1</b><br>F (2,20)                   | HDAC1                | 0.494       | <0.001   | 0.83           | 0.80                    | <0.001   |
|                                            | HDAC2                | 0.307       | 0.254    |                |                         |          |
|                                            | HDAC9                | 0.382       | 0.004    |                |                         |          |
| <b>RELA</b><br>F (2,20)                    | HDAC1                | 0.637       | <0.001   | 0.90           | 0.88                    | <0.001   |
|                                            | HDAC2                | 0.301       | 0.182    |                |                         |          |
|                                            | HDAC9                | 0.339       | 0.003    |                |                         |          |
| <b>MAPK1</b><br>F (2,20)                   | HDAC1                | 0.041       | 0.611    | 0.58           | 0.51                    | <0.001   |
|                                            | HDAC2                | 0.801       | 0.004    |                |                         |          |
|                                            | HDAC9                | 0.091       | 0.450    |                |                         |          |

TNF- $\alpha$ ; tumour necrosis factor- $\alpha$ . IL-6; interleukin 6. <sup>1</sup> TNF- $\alpha$  measured in supernatant of LPS-stimulated monocytes. <sup>2</sup> mRNA gene expression measured in 2<sup>- $\Delta$ CT</sup>.

Table S2. Multiple linear regression model. mRNA gene expression of monocytes following butyrate treatment.

|                          | Independent Variable | Model       |          |                |                         |          |
|--------------------------|----------------------|-------------|----------|----------------|-------------------------|----------|
|                          |                      | Coefficient | <i>p</i> | R <sup>2</sup> | Adjusted R <sup>2</sup> | <i>p</i> |
| <b>NFKB1</b><br>F (2,20) | FFAR2                | 0.625       | 0.020    | 0.24           | 0.17                    | 0.063    |
|                          | FFAR3                | -0.206      | 0.334    |                |                         |          |
| <b>NFKB1</b><br>F (2,20) | HDAC1                | 0.567       | <0.001   | 0.82           | 0.79                    | <0.001   |
|                          | HDAC2                | 0.313       | 0.098    |                |                         |          |
|                          | HDAC9                | 0.097       | 0.456    |                |                         |          |
| <b>RELA</b><br>F (2,20)  | HDAC1                | 0.557       | <0.001   | 0.89           | 0.87                    | <0.001   |
|                          | HDAC2                | 0.309       | 0.033    |                |                         |          |
|                          | HDAC9                | 0.171       | 0.090    |                |                         |          |
| <b>MAPK1</b><br>F (2,20) | HDAC1                | 0.074       | 0.243    | 0.87           | 0.85                    | <0.001   |
|                          | HDAC2                | 0.694       | <0.001   |                |                         |          |
|                          | HDAC9                | 0.242       | 0.006    |                |                         |          |

<sup>1</sup> mRNA gene expression measured in 2<sup>- $\Delta$ CT</sup>.
